# Supplementary material for: Analysis of Perioperative Platelet Indices and Their Prognostic Value in Head and Neck Cancer Patients Treated with Surgery and Postoperative Radiotherapy: A Retrospective Cohort Study
Source: PubMed Central journal article supplement (PMC6912733; doi:10.3390/jcm8111858), 2019-11-02

## Supplementary Tables

**Supplementary Table 1** Preoperative platelet indices: Univariable and multivariable time-to-event analysis. Multivariable models were adjusted for TNM-stage, HPV status and smoker status.

|                              | Univariable |           |         | Multivariable |           |         |
|------------------------------|-------------|-----------|---------|---------------|-----------|---------|
|                              | HR          | 95% CI    | p-value | HR            | 95% CI    | p-value |
| <b>Overall survival</b>      |             |           |         |               |           |         |
| COP (per 50 G/l increase)    | 1.04        | 0.87-1.23 | 0.645   | 1.01          | 0.85-1.19 | 0.908   |
| MPV (per 1 FL increase)      | 1.02        | 0.81-1.30 | 0.807   | 0.98          | 0.77-1.24 | 0.891   |
| MPV/COP ratio per 1 increase | 1.05        | 0.91-1.21 | 0.473   | 1.05          | 0.90-1.22 | 0.490   |
| <b>Disease-free survival</b> |             |           |         |               |           |         |
| COP (per 50 G/l increase)    | 1.02        | 0.84-1.24 | 0.812   | 1.00          | 0.82-1.23 | 0.944   |
| MPV (per 1 FL increase)      | 1.03        | 0.77-1.37 | 0.811   | 1.10          | 0.80-1.51 | 0.550   |
| MPV/COP ratio per 1 increase | 1.01        | 0.85-1.21 | 0.856   | 1.03          | 0.85-1.24 | 0.724   |

**Supplementary Table 2** Frequency of increase or decrease in platelet indices at day 1 and week 1 compared to the corresponding preoperative measurement. Absolute and relative frequencies are given.

|               |   | 1 day     | 1 week   |
|---------------|---|-----------|----------|
| COP           | ↑ | 11 (10%)  | 79 (72%) |
|               | ↓ | 101 (90%) | 31 (28%) |
| MPV           | ↑ | 38 (37%)  | 34 (33%) |
|               | ↓ | 65 (63%)  | 69 (67%) |
| MPV/COP ratio | ↑ | 94 (91%)  | 28 (27%) |
|               | ↓ | 9 (9%)    | 75 (73%) |

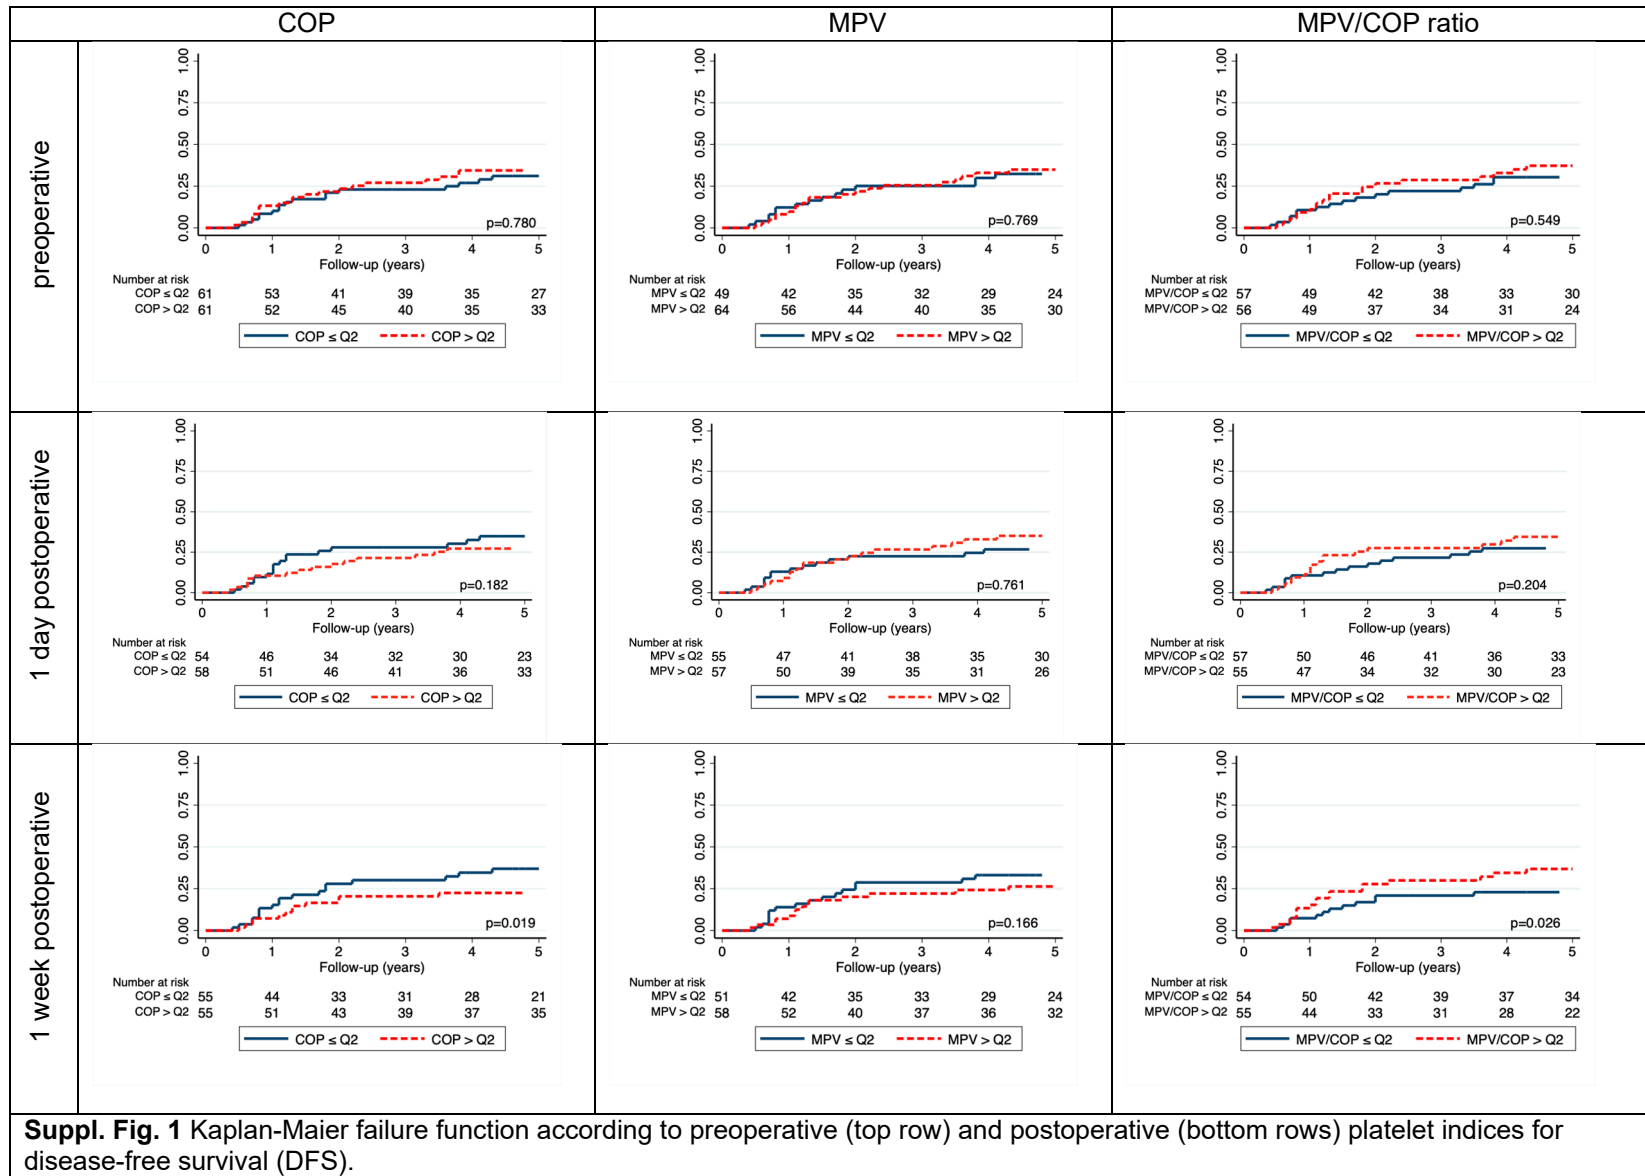

Supplement: jcm-08-01858-s001.pdf [file jcm-08-01858-s001.pdf]
